# Supplementary material for: Intumescent flame retardant-derived P,N co-doped porous carbon as an efficient electrocatalyst for the oxygen reduction reaction
Source: Royal Society of Chemistry journal article supplement (doi:10.1039/c5cc05960g), 2015-01-01
Supplement: c5cc05960g1.pdf [file c5cc05960g1.pdf]

## Electronic supplementary information (ESI)

### **Intumescent flame retardant-derived P,N co-doped porous carbon as an efficient electrocatalyst for the oxygen reduction reaction**

Yinling Wang,<sup>\*a</sup> Xuemei Zhang,<sup>a</sup> Anna Li<sup>a</sup> and Maoguo Li<sup>\*a</sup>

#### **Experimental section**

**Chemicals.** Dopamine hydrochloride (DA) was purchased from Acros Organics (New Jersey, USA). Melamine (MA) was of chemical pure, purchased from Shanghai Lingfeng Chemical Reagent Co., Ltd (Shanghai, China). Ammonium polyphosphate (APP) was kindly provided by Professor Hu and Dr. Song from State key laboratory of fire science of University of Science and Technology of China (USTC, Hefei, China). 20% Pt/C was purchased from Alfa Aesar (Johnson Matthey Public Limited Company, England). All the reagents were used without further purification. Milli-Q purified water (Millipore,  $\geq 18.2$  M $\Omega$  cm) was used throughout the study.

**Synthesis of C-PMA, C-P, C-PM and C-PA.** For preparation of C-PMA, 1 g DA, 25 g MA and 150 mg APP were dispersed in 100 mL ultrapure water. Then the pH value was adjusted to 8.5 using Tris buffer solution and stirred for 24 h for the polymerization of DA. After washed by ultrapure water and ethanol, the precipitation was dried at 60 °C. Finally, the mixture was subjected to a pyrolysis at 1000 °C for 1 h with the protection of high purity nitrogen. The synthesis of C-P, C-PM and C-PA were similar to that of C-PMA.

**Material characterization.** X-ray diffraction (XRD) patterns were recorded by a D8 advance diffractometer (Gernamy, Bruker). Scanning electron microscopy (SEM) images were obtained from a JEOL JSM-6700F field emission scanning electron microscope (FE-SEM); Transmission electron microscopy (TEM) studies of the carbon materials were carried out on a TECNAI-G2 F20 microscope (FEI, US). X-ray photoelectron spectroscopy (XPS) was performed using a Thermo ESCALAB 250XI spectrometer with Al K $\alpha$  radiation (Thermo Fisher

Scientific, USA). The Brunauer-Emmet-Teller (BET) tests of the samples were measured by N<sub>2</sub> adsorption/desorption using a 3Flex adsorption instrument (US, Micromeritics). Raman spectra were tested on a LabRAM HR800 confocal microscope Raman system (Horiba Jobin Yvon).

**Preparation of modified electrodes.** Prior to use, the GCE was carefully polished with alumina powder (1.0, 0.3, 0.05  $\mu\text{m}$  orderly) on a wet polishing cloth and then thoroughly cleaned ultrasonically in acetone and pure water. Next, for CV and chronoamperometry measurement, 5  $\mu\text{L}$  of the suspension of catalyst (5 mg/mL, dispersed in water by ultrasonication) were casted on the GCE (the loading amount of catalyst is about  $0.352\text{ mg cm}^{-2}$ ) and was later covered with a layer of Nafion film. For RDE measurements, 10  $\mu\text{L}$  of the suspension were dropped onto the GC disk work electrode (the loading amount of catalyst is about  $0.255\text{ mg cm}^{-2}$ ), which was also immobilized by a layer of Nafion film.

**Electrochemical measurements.** Cyclic voltammetry (CV) and chronoamperometry were carried out on a CHI660C electrochemical workstation (CH Instruments, Shanghai, China). A conventional three-electrode system was employed with a platinum wire as the counter electrode, an HgO/Hg (0.1 M KOH) electrode as the reference electrode, and a modified glassy carbon electrode (GCE, 3 mm in diameter) as the working electrode.

The rotating disk electrode (RDE) measurements were performed on a Bipotentiostat Model AFCBP1 electrochemical workstation with a mating rotating disk electrode (RDE, Pine Research Ins, USA). A similar three-electrode system to that of cyclic voltammetry was adopted except that the GC disk electrode was 5 mm in diameter.

All the electrochemical measurements were conducted in 0.1 M KOH saturated with N<sub>2</sub> or O<sub>2</sub>. The scan rates are  $50\text{ mV s}^{-1}$  for CV and  $10\text{ mV s}^{-1}$  for RDE measurements, respectively.

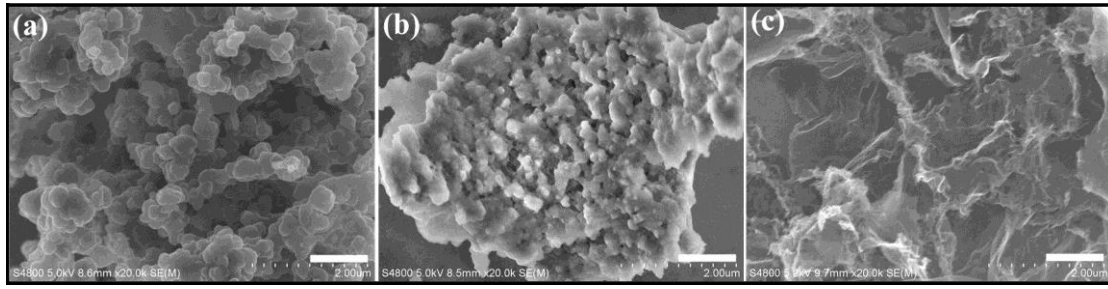

**Fig. S1** SEM images of (a) C-P, (b) C-PA, and (c) C-PM. The scale bar is 1  $\mu\text{m}$ .

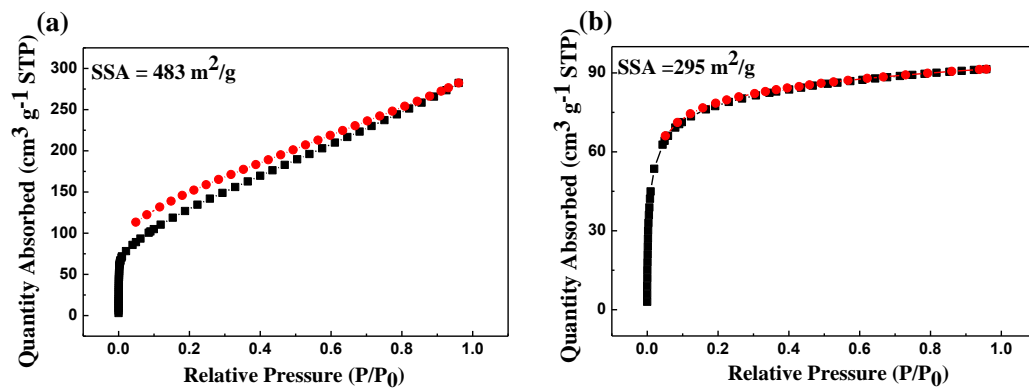

**Fig. S2**  $\text{N}_2$  adsorption-desorption isotherm of (a) C-P and (b) C-PM.

**Table S1** Composition of the specific surface area for different carbon materials.

| Material | $S_{\text{BET}}$ ( $\text{m}^2/\text{g}$ ) | $S_{\text{micro}}$ ( $\text{m}^2/\text{g}$ ) | $S_{\text{external}}$ ( $\text{m}^2/\text{g}$ ) |
|----------|--------------------------------------------|----------------------------------------------|-------------------------------------------------|
| C-P      | 483                                        | Negative value                               | 535                                             |
| C-PM     | 296                                        | 163                                          | 133                                             |
| C-PMA    | 401                                        | 296                                          | 170                                             |

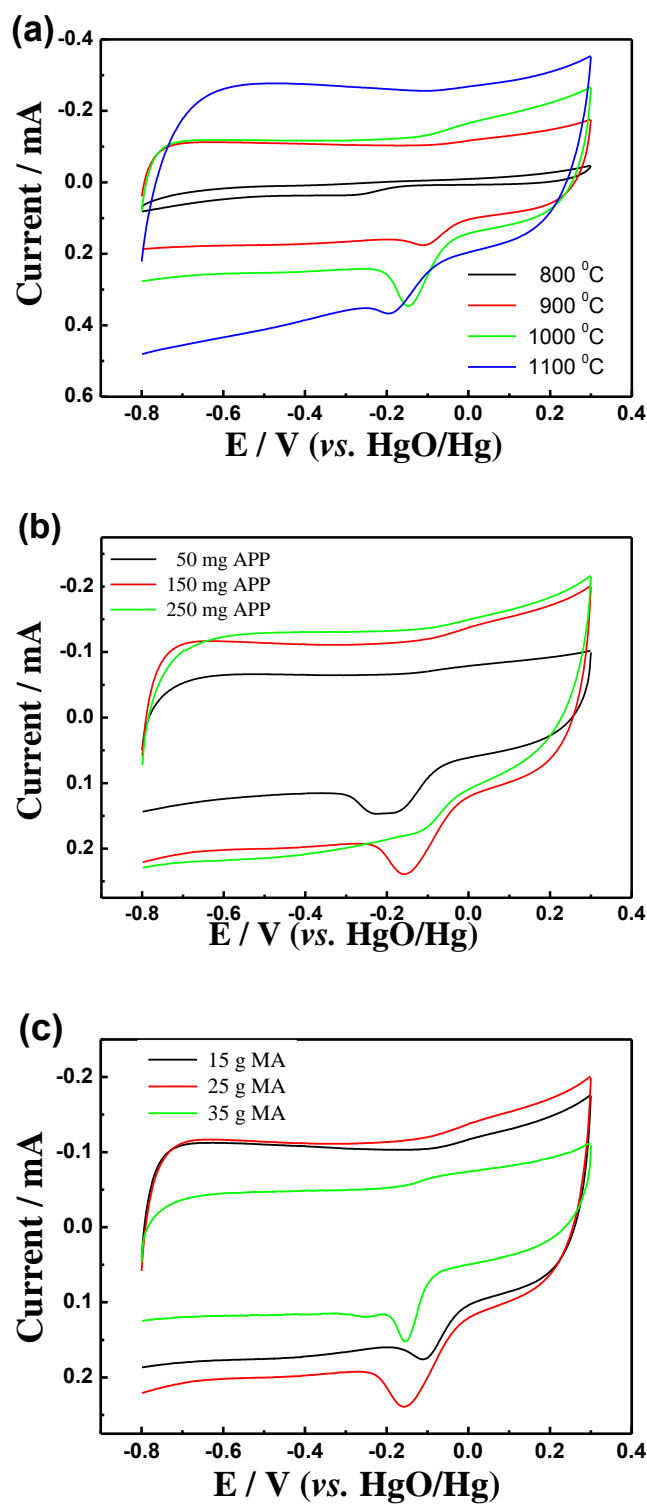

**Fig. S3** CV curves of (a) C-MPA prepared at different temperature, (b) C-MPA prepared at 1000  $^{\circ}\text{C}$  with different mass of APP (The mass of DA was fixed at 1 g and The mass of MA was fixed at 25 g), and (c) C-MPA prepared at 1000  $^{\circ}\text{C}$  with different mass of MA (The mass of DA was fixed at 1 g and The mass of APP was fixed at 150 mg) in the  $O_2$ -saturated 0.1 M KOH solution at a scan rate of  $50 \text{ mV s}^{-1}$ .

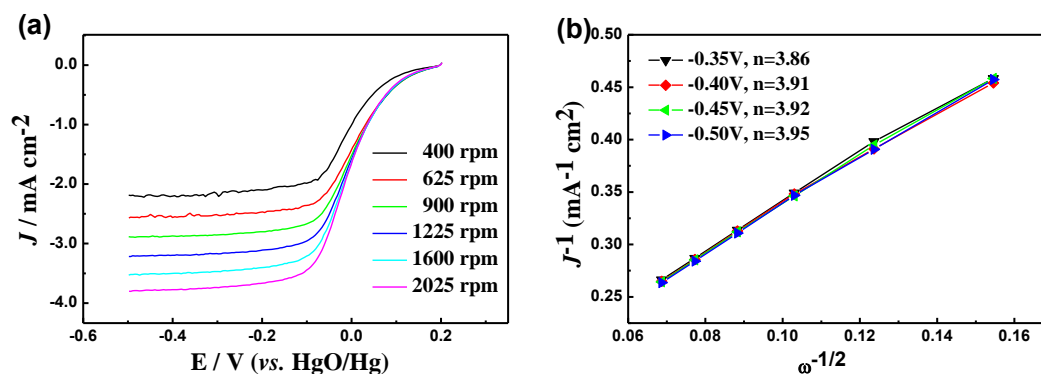

**Fig. S4** (a) LSV curves at different rotation rates of 20% Pt/C and (b) the corresponding Koutecky-Levich plots ( $J^{-1}$  versus  $\omega^{-1/2}$ ) at different electrode potentials. The average transferred electron number is about 3.9.

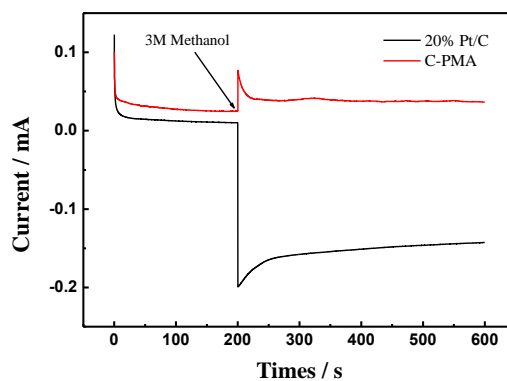

**Fig. S5** The effect of methanol on the chronoamperometric responses of C-PMA and 20% Pt/C in O<sub>2</sub> saturated 0.1 M KOH solution. The applied potential is fixed at -0.3V.
